# Supplementary material for: Gene expression profiling of M. truncatula transcription factors identifies putative regulators of grain legume seed filling
Source: Springer Nature journal article supplement (doi:10.1007/s11103-008-9320-x), 2008-06-04
Supplement: MOESM3 [file 11103_2008_9320_MOESM3_ESM.doc]

**Table S1:** Complete list of TF genes with BAC number and TC match, primer sequences and experimental data.

**Table S2:** Housekeeping genes tested to normalize real-time RT-PCR data with stability values (M) calculated using geNORM software. Bold type indicates the four housekeeping genes chosen to normalize the real-time RT-PCR data. Expression profiles throughout seed development of the four most stable housekeeping genes and of their geometric means are presented.

**Table S3:** List of 512 TFs expressed throughout seed development and showing a consistent profile in both biological replicates (p-value< 5%).

**Table S4:** Clustering classification of 169 TFs showing a differential expression pattern throughout seed development. TFs are ranked in different clusters with names, tentative family annotations with BAC accession numbers or annotations and normalized expression data from the two biological replicates. The three major *M. truncatula* seed storage proteins are classified in corresponding clusters.

**Table S5:** List of genes from the microarray dataset co-expressed with seed tissue-specific TFs. Correlations between expression profiles of TF and co-expressed genes are indicated. Expression profiles and functional classification according Mapman are indicated for each gene.

**Table S6:** List of TFs preferentially expressed in a seed tissue and their putative Arabidopsis orthologues according to tblastx analyses, with comparisons of expression profiles throughout seed development and in other plant tissues. ID, descriptions, annotations, cluster and seed tissue pattern are indicated for *M. truncatula.* Putative orthologues using tblastx (AtGI database) and their expression in plant organs and throughout seed development, (from stage 3 corresponding to embryogenesis to stage 10 corresponding to mature seed), according to Genevestigator, are indicated for Arabidopsis. Arabidopsis genes in grey characters correspond to genes showing sequence homology but having different expression profiles. Arabidopsis genes in black characters correspond to putative orthologues of *M. truncatula* TFs identified in this study and reported in Table 1.
